# Supplementary material
Source: ML conference proceedings conference paper supplement (https://proceedings.neurips.cc/paper_files/paper/2018/hash/39059724f73a9969845dfe4146c5660e-Abstract.html)
Supplement: Supplementary file [file 39059724f73a9969845dfe4146c5660e-Supplemental.zip]

---

# Rest-Katyusha: Exploiting the Solution’s Structure via Scheduled Restart Schemes (*Supplementary Material*)

---

**Junqi Tang**  
School of Engineering  
University of Edinburgh, UK  
J.Tang@ed.ac.uk

**Mohammad Golbabaee**  
Department of Computer Science  
University of Bath, UK  
M.Golbabaee@bath.ac.uk

**Francis Bach**  
INRIA - ENS  
PSL Research University, France  
Francis.Bach@inria.fr

**Mike Davies**  
School of Engineering  
University of Edinburgh, UK  
Mike.Davies@ed.ac.uk

In this supplementary material we include in section A the proof of our main result which establishes the structure-adaptive and accelerated linear convergence rate for Rest-Katyusha algorithm. Further, in section B we also extend our analysis to the case where we underestimate the RSC parameter. We also provide an additional numerical result for testing the convergence rate of Rest-Katyusha with different choices of the input parameter  $\beta$ .

## A Proof of Theorem 3.4 and Corollary 3.5

We first state the convergence result for Katyusha algorithm for non-strongly convex functions:

**Lemma A.1.** *[1, Theorem 4.1] Under A.3, starting at  $x^0$ , with epoch length  $m = 2n$ , denote  $\mathcal{D}(x^0, x^*) := 16(F(x^0) - F^*) + \frac{6L}{n}\|x^0 - x^*\|_2^2$ , the  $s$ -th snapshot point  $\hat{x}^s$  of Katyusha algorithm satisfies:*

$$\mathbb{E}[F(\hat{x}^s)] - F^* \leq \frac{\mathcal{D}(x^0, x^*)}{(s+3)^2}. \quad (1)$$

Now based on the inequality of effective RSC by Lemma 3.3 in the main text we are able to provide the proof of our main result.

*Proof.* At each iteration, the algorithm chooses an index  $i$  uniformly at random to perform the calculation of one stochastic variance-reduced gradient. The update sequences  $y_{k+1}$  and  $z_{k+1}$  within  $t$ -th outer-loop of Rest-Katyusha depend on the realization of the following random variable which we denote as  $\xi_k^t$ :

$$\xi_t = \{i_m^t, i_{m-1}^t, \dots, i_1^t, i_0^t, i_m^{t-1}, \dots, i_0^{t-1}, \dots, i_m^0, \dots, i_0^0\}, \quad (2)$$

and for the randomness within a single outer-loop of Rest-Katyusha we specifically denote  $\xi_t \setminus \xi_{t-1}$  as

$$\xi_t \setminus \xi_{t-1} = \{i_m^t, i_{m-1}^t, \dots, i_1^t, i_0^t\}. \quad (3)$$

According to Lemma A.1, setting  $m = 2n$ , for the first stage  $t = 0$ :

$$\mathbb{E}_{\xi_0}[F(x^1)] - F^* \leq \epsilon_1 := \frac{4}{n(S_0 + 3)^2} \left[ 4n \left( F(x^0) - F^* \right) + \frac{3L}{2} \|x^0 - x^*\|_2^2 \right].$$

Then, applying Markov's inequality, with probability at least  $1 - \frac{\rho}{2}$  we have:

$$F(x^1) - F^* \leq \frac{2}{\rho} \epsilon_1. \quad (4)$$

Then we define three sequences  $\epsilon_t$ ,  $\rho_t$  and  $v_t$ :  $\epsilon_{t+1} = \frac{1}{\beta^2} \epsilon_t > \varepsilon$ ,  $\rho_{t+1} = \frac{1}{\beta} \rho_t$  (with  $\rho_1 := \rho$ ),  $v_t = \frac{2\epsilon_t}{\lambda \rho_t} + \varepsilon$ . Next we use an induction argument to upper bound  $\mathbb{E}_{\xi_{t-1}} F(x^t) - F^*$ .

**Induction step 1:** We turn to the first iteration of the second stage, note that due to the effective RSC, we can write:

$$\|x - x^*\|_2^2 \leq \frac{1}{\mu_c} \left[ F(x) - F^* + 2\tau(1+c)^2 v^2 \right], \quad (5)$$

hence we can have the following:

$$\begin{aligned} \mathbb{E}_{\xi_1 \setminus \xi_0} [F(x^2) - F^*] &\leq \frac{16}{(S+3)^2} [F(x^1) - F^*] + \frac{6L}{n\mu_c(S+3)^2} [F(x^1) - F^* + 2\tau(1+c)^2 v_1^2] \\ &\leq \frac{16 + \frac{6L}{n\mu_c}}{(S+3)^2} [F(x^1) - F^*] + \frac{12L\tau(1+c)^2}{n\mu_c(S+3)^2} v_1^2, \end{aligned}$$

and then we take expectation over  $\xi_0$  we have:

$$\begin{aligned} \mathbb{E}_{\xi_1} [F(x^2) - F^*] &\leq \frac{16 + \frac{6L}{n\mu_c}}{(S+3)^2} \mathbb{E}_{\xi_0} [F(x^1) - F^*] + \frac{12L\tau(1+c)^2}{n\mu_c(S+3)^2} v_1^2 \\ &= \frac{16 + \frac{6L}{n\mu_c}}{(S+3)^2} \epsilon_1 + \frac{12L\tau(1+c)^2}{n\mu_c(S+3)^2} \left( \frac{2\epsilon_1}{\rho\lambda} + \varepsilon \right)^2 \\ &\leq \frac{16 + \frac{6L}{n\mu_c}}{(S+3)^2} \epsilon_1 + \frac{12L\tau(1+c)^2}{n\mu_c(S+3)^2} \left( \frac{2\epsilon_1}{\rho\lambda} + \epsilon_1 \right)^2. \end{aligned}$$

then we set:

$$\frac{12L\tau(1+c)^2}{n\mu_c} \left[ \left( \frac{2}{\rho\lambda} + 1 \right) \epsilon_1 \right]^2 \leq \left( 16 + \frac{6L}{n\mu_c} \right) \epsilon_1, \quad (6)$$

equivalently:

$$\left( \frac{2}{\rho\lambda} + 1 \right)^2 \epsilon_1 \leq \frac{8n\mu_c + 3L}{6L\tau(1+c)^2}, \quad (7)$$

and denote  $\mathcal{D}(x^0, x^*) := 16[F(x^0) - F^*] + \frac{6L}{n} \|x^0 - x^*\|_2^2$ , we have:

$$\epsilon_1 := \frac{\mathcal{D}(x^0, x^*)}{(S_0 + 3)^2} \leq \frac{8n\mu_c + 3L}{6L\tau(1+c)^2 \left( \frac{2}{\rho\lambda} + 1 \right)^2}. \quad (8)$$

Hence in order to satisfy inequality (6), it is enough to set:

$$S_0 \geq \left\lceil \left( 1 + \frac{2}{\rho\lambda} \right) \sqrt{\frac{6L\tau(1+c)^2 \mathcal{D}(x^0, x^*)}{8n\mu_c + 3L}} \right\rceil. \quad (9)$$

By this choice of  $S_0$ , according to inequality (6) we can write:

$$\mathbb{E}_{\xi_1} [F(x^2) - F^*] \leq \frac{32 + \frac{12L}{n\mu_c}}{(S+3)^2} \epsilon_1, \quad (10)$$

to get  $\mathbb{E}_{\xi_1} [F(x^2) - F^*] \leq \frac{1}{\beta^2} \epsilon_1 = \epsilon_2$ , it is enough to set:

$$S = \left\lceil \beta \sqrt{32 + \frac{12L}{n\mu_c}} \right\rceil \quad (11)$$

**Induction step 2:** For the  $(t + 1)$ -th iteration, according to the induction hypothesis, we have  $\mathbb{E}_{\xi_{t-1}} F(x^t) - F^* \leq \frac{\epsilon_{t-1}}{\beta^2} = \epsilon_t$ , and hence with probability  $1 - \frac{\rho_t}{2}$  we have:

$$\begin{aligned} \mathbb{E}_{\xi_t} [F(x^{t+1}) - F^*] &\leq \frac{16 + \frac{6L}{n\mu_c}}{(S+3)^2} \mathbb{E}_{\xi_{t-1}} [F(x^t) - F^*] + \frac{12L\tau(1+c)^2}{n\mu_c(S+3)^2} v_t^2 \\ &= \frac{16 + \frac{6L}{n\mu_c}}{(S+3)^2} \epsilon_t + \frac{12L\tau(1+c)^2}{n\mu_c(S+3)^2} \left( \frac{2\epsilon_t}{\rho_t\lambda} + \varepsilon \right)^2 \\ &\leq \frac{16 + \frac{6L}{n\mu_c}}{(S+3)^2} \epsilon_t + \frac{12L\tau(1+c)^2}{n\mu_c(S+3)^2} \left( \frac{2\epsilon_t}{\rho_t\lambda} + \epsilon_t \right)^2. \end{aligned}$$

then we set:

$$\frac{12L\tau(1+c)^2}{n\mu_c} \left[ \left( \frac{2}{\rho_t\lambda} + 1 \right) \epsilon_t \right]^2 \leq \left( 16 + \frac{6L}{n\mu_c} \right) \epsilon_t, \quad (12)$$

equivalently:

$$\left( \frac{2}{\rho_t\lambda} + 1 \right)^2 \epsilon_t \leq \frac{8n\mu_c + 3L}{6L\tau(1+c)^2}, \quad (13)$$

Now because  $\rho_t = \frac{1}{\beta} \rho_{t-1}$ ,  $\epsilon_t = \frac{1}{\beta^2} \epsilon_{t-1}$ , we have:

$$\left( \frac{2}{\rho_t\lambda} + 1 \right)^2 \epsilon_t = \left( \frac{2}{\rho_{t-1}\lambda} + \frac{1}{\beta} \right)^2 \epsilon_{t-1} \leq \left( \frac{2}{\rho_{t-1}\lambda} + 1 \right)^2 \epsilon_{t-1} \leq \dots \leq \left( \frac{2}{\rho_1\lambda} + 1 \right)^2 \epsilon_1. \quad (14)$$

Hence by the same choice of  $S_0$  given by (9), inequality (12) holds and consequently we can have:

$$\mathbb{E}_{\xi_t} [F(x^{t+1}) - F^*] \leq \frac{32 + \frac{12L}{n\mu_c}}{(S+3)^2} \epsilon_t, \quad (15)$$

to get  $\mathbb{E}_{\xi_t} [F(x^{t+1}) - F^*] \leq \frac{1}{\beta^2} \epsilon_t = \epsilon_{t+1}$ , it is enough to set:

$$S = \left\lceil \beta \sqrt{32 + \frac{12L}{n\mu_c}} \right\rceil. \quad (16)$$

Hence we finish the induction – by the choice of:

$$S_0 \geq \left\lceil \left( 1 + \frac{2}{\rho\lambda} \right) \sqrt{\frac{6L\tau(1+c)^2 \mathcal{D}(x^0, x^*)}{8n\mu_c + 3L}} \right\rceil, \quad S = \left\lceil \beta \sqrt{32 + \frac{12L}{n\mu_c}} \right\rceil, \quad (17)$$

then we will have:

$$\mathbb{E}_{\xi_t} [F(x^{t+1}) - F^*] \leq \frac{\epsilon_t}{\beta^2} \quad (18)$$

where  $\epsilon_{t+1} = \frac{1}{\beta^2} \epsilon_t$  and  $\epsilon_1 = \frac{\mathcal{D}(x^0, x^*)}{(S_0+3)^2} = \frac{4}{n(S_0+3)^2} \left[ 4n(F(x^0) - F^*) + \frac{3L}{2} \|x^0 - x^*\|_2^2 \right]$ , with probability  $1 - \sum_{i=1}^t \frac{\rho_i}{2} \geq 1 - \frac{\rho}{2} \frac{\beta}{\beta-1} \geq 1 - \rho$  (since  $\beta \geq 2$ ). Now we have finished the proof of Theorem 3.4.

**Proof of Corollary 3.5.** Finally we make a summary of this result for the proof of Corollary 3.5. First we write the number of snapshot point calculation we need to achieve  $\mathbb{E}_{\xi_{t-1}} F(x^t) - F^* \leq \delta$  at the second stage:

$$N_s = \left\lceil \beta \sqrt{32 + \frac{12L}{n\mu_c}} \right\rceil \log_{\beta^2} \frac{F(x^1) - F^*}{\delta}. \quad (19)$$

When  $\frac{2n\mu_c}{L} \leq \frac{3}{4}$ ,  $N_s = O \left( \sqrt{\frac{L}{2n\mu_c}} \log \frac{F(x^1) - F^*}{\delta} \right)$ ; when  $\frac{2n\mu_c}{L} \geq \frac{3}{4}$ ,  $N_s = O \left( \log \frac{F(x^1) - F^*}{\delta} \right)$ .

Hence it is enough to run  $O \left( \left( 1 + \sqrt{\frac{L}{2n\mu_c}} \right) \log \frac{F(x^1) - F^*}{\delta} \right) \geq O \left( \max(1, \sqrt{\frac{L}{2n\mu_c}}) \log \frac{F(x^1) - F^*}{\delta} \right)$

epochs. Since we set the epoch length  $m = 2n$  and hence the number of stochastic gradient  $\nabla f_i(\cdot)$  calculation is of  $O(n)$ . Therefore with some more straightforward calculation we conclude that the complexity of the Rest-Katyusha algorithm is:

$$N \geq O \left( n + \sqrt{\frac{nL}{\mu_c}} \right) \log \frac{\frac{1}{\rho(S_0+3)^2} \left[ 16(F(x^0) - F^*) + \frac{6L}{n} \|x^0 - x^*\|_2^2 \right]}{\delta} + O(n)S_0. \quad (20)$$

□

## B Rest-Katyusha with an underestimation of $\mu_c$

It is generally not guaranteed that any accelerated stochastic variance-reduced gradient method designed for strongly-convex functions can be directly applied in our modified restricted strong-convexity setting, even when the RSC parameter can be exactly known. It is true that for strongly-convex functions with known strong-convexity parameter, that the convergence rates for a restarted version of non-strongly-convex accelerated gradient descent and the strongly-convex accelerated gradient descent are the same, and we believe that this may be the case for Katyusha as well if the objective is strongly-convex. However, it is still an open question for an objective which only satisfies restricted strong-convexity. One may heuristically replace our algorithm's second stage with the strongly-convex version of Katyusha and this seems to have a comparable result empirically for some datasets if the RSC is accurately given (this is necessary for this method). However, the Rest-Katyusha is superior to this alternative – (1) in terms of theory, as it is a provably convergent algorithm, (2) in terms of practice, Rest-Katyusha appears to be much more robust to the inaccurate estimation of RSC. This section we provide an analysis for Rest-Katyusha where we underestimate the RSC parameter.

We have already established the convergence result for Rest-Katyusha algorithm when it is restarted at a frequency  $S = \left\lceil \beta \sqrt{32 + \frac{12L}{n\mu_c}} \right\rceil$ , but in practice the effective RSC parameter  $\mu_c$  is usually unknown and difficult to estimate accurately. We need to find some practical approaches to estimate  $\mu_c$  and determine whether to restart or not on the fly. To lay down the basics, we now warm up with the analysis for Rest-Katyusha when only an underestimation of  $\mu_c$  is given, to see how the convergence rate of the algorithm will change.

---

**Algorithm 1** Rest-Katyusha with a rough RSC estimate  $(x^0, \mu_0, \beta, S_0, T, L)$

---

**Initialize:**  $m = 2n, S = \left\lceil \beta \sqrt{32 + \frac{12L}{n\mu_0}} \right\rceil$ ;  
 $x^1 = \text{Katyusha}(x^0, m, S_0, L)$   
**for**  $t = 1, \dots, T$  **do**  
 $x^{t+1} = \text{Katyusha}(x^t, m, S, L)$   
**end for**

---

We present the rough RSC estimate version of Rest-Katyusha. The only difference is that the restart period has changed from  $\left\lceil \beta \sqrt{32 + \frac{12L}{n\mu_c}} \right\rceil$  to  $\left\lceil \beta \sqrt{32 + \frac{12L}{n\mu_0}} \right\rceil$ , where  $\mu_0$  is an rough (under-)estimate of the effective RSC constant  $\mu_c$  and  $\beta \geq 2$  is a constant which controls the robustness of possible overestimation. With this restart period, we are able to establish accelerated linear convergence result in the regime where  $0 < \mu_0 < \frac{\beta^2}{4}\mu_c$ . In other words, with this restart period, as long as  $\mu_c$  is no more than  $\beta^2/4$  times overestimated by  $\mu_0$ ,

the Rest-Katyusha is guaranteed to achieve accelerated linear convergence w.r.t.  $\mu_0$ .

**Theorem B.1.** *Under A.1 - 4, denote  $\varepsilon := 2\Phi(\mathcal{M})\|x^\dagger - x^*\|_2 + 4g(x_{\mathcal{M}^\perp}^\dagger)$ ,  $\mathcal{D}(x^0, x^*) := 16(F(x^0) - F^*) + \frac{6L}{n}\|x^0 - x^*\|_2^2$ ,  $\mu_c = \frac{\gamma}{2} - 8\tau(1+c)^2\Phi^2(\mathcal{M})$ , and  $0 < \mu_0 < \frac{\beta^2}{4}\mu_c$ , with  $\beta \geq 2$ , if we run Rest-Katyusha with  $S_0 \geq \left\lceil \left(1 + \frac{2}{\rho\lambda}\right) \sqrt{2\tau(1+c)^2\mathcal{D}(x^0, x^*)} \right\rceil$ ,  $S = \left\lceil \beta \sqrt{32 + \frac{12L}{n\mu_0}} \right\rceil$ , then the following inequality holds:*

$$\mathbb{E}[F(x^{T+1}) - F^*] \leq \max \left\{ \varepsilon, \left( \frac{\mu_0}{\mu_c \beta^2} \right)^T \frac{\mathcal{D}(x^0, x^*)}{(S_0 + 3)^2} \right\}, \quad (21)$$

with probability at least  $1 - \rho$ .

**Corollary B.2.** *Under the same assumptions, parameter choices and notations as Theorem B.1, the total number of stochastic gradient evaluation required by Rest-Katyusha to get an  $\delta$ -accuracy is:*

$$O\left(n + \sqrt{\frac{nL}{\mu_0}}\right) \log_{\frac{\beta^2 \mu_c}{\mu_0}} \frac{1}{\delta} + O(n)S_0, \quad (22)$$

*Proof.* At each iteration, the algorithm chooses an index  $i$  uniformly at random to perform the calculation of one stochastic variance-reduced gradient. The update sequences  $y_{k+1}$  and  $z_{k+1}$  within  $t$ -th outer-loop of Rest-Katyusha depend on the realization of the following random variable which we denote as  $\xi_k^t$ :

$$\xi_t = \{i_m^t, i_{m-1}^t, \dots, i_1^t, i_0^t, i_m^{t-1}, \dots, i_0^{t-1}, \dots, i_m^0, \dots, i_0^0\}, \quad (23)$$

and for the randomness within a single outer-loop of Rest-Katyusha we specifically denote  $\xi_t \setminus \xi_{t-1}$  as

$$\xi_t \setminus \xi_{t-1} = \{i_m^t, i_{m-1}^t, \dots, i_1^t, i_0^t\}. \quad (24)$$

According to Lemma A.1, setting  $m = 2n$ , for first stage  $t = 0$ :

$$\mathbb{E}_{\xi_0}[F(x^1)] - F^* \leq \epsilon_1 := \frac{4}{n(S_0 + 3)^2} \left[ 4n(F(x^0) - F^*) + \frac{3L}{2}\|x^0 - x^*\|_2^2 \right].$$

Then with probability at least  $1 - \frac{\rho}{2}$  we have:

$$F(x^1) - F^* \leq \frac{2}{\rho} \epsilon_1. \quad (25)$$

Then we denote  $\alpha = \frac{\mu_0}{\mu_c}$  and also define three sequences  $\epsilon_t$ ,  $\rho_t$  and  $v_t$ :  $\epsilon_{t+1} = \frac{\alpha}{\beta^2} \epsilon_t$ ,  $\rho_{t+1} = \frac{\sqrt{\alpha}}{\beta} \rho_t$  (with  $\rho_1 := \rho$ ),  $v_t = \frac{2\epsilon_t}{\lambda \rho_t} + \varepsilon$ . Next we use an induction argument to upper bound  $\mathbb{E}_{\xi_{t-1}} F(x^t) - F^*$ .

**Induction step 1:** We turn to the first iteration of the second stage, note that due to the effective RSC, we can write:

$$\|x - x^*\|_2^2 \leq \frac{1}{\mu_c} \left[ F(x) - F^* + 2\tau(1+c)^2 v^2 \right], \quad (26)$$

hence we can have the following:

$$\begin{aligned} \mathbb{E}_{\xi_1 \setminus \xi_0}[F(x^2) - F^*] &\leq \frac{16}{(S+3)^2} [F(x^1) - F^*] + \frac{6L}{n\mu_c(S+3)^2} [F(x^1) - F^* + 2\tau(1+c)^2 v_1^2] \\ &\leq \frac{16 + \frac{6L}{n\mu_c}}{(S+3)^2} [F(x^1) - F^*] + \frac{12L\tau(1+c)^2}{n\mu_c(S+3)^2} v_1^2, \end{aligned}$$

and then we take expectation over  $\xi_0$  we have:

$$\begin{aligned} \mathbb{E}_{\xi_1}[F(x^2) - F^*] &\leq \frac{16 + \frac{6L}{n\mu_c}}{(S+3)^2} \mathbb{E}_{\xi_0}[F(x^1) - F^*] + \frac{12L\tau(1+c)^2}{n\mu_c(S+3)^2} v_1^2 \\ &= \frac{16 + \frac{6L}{n\mu_c}}{(S+3)^2} \epsilon_1 + \frac{12L\tau(1+c)^2}{n\mu_c(S+3)^2} \left( \frac{2\epsilon_1}{\rho\lambda} + \varepsilon \right)^2 \\ &\leq \frac{16 + \frac{6L}{n\mu_c}}{(S+3)^2} \epsilon_1 + \frac{12L\tau(1+c)^2}{n\mu_c(S+3)^2} \left( \frac{2\epsilon_1}{\rho\lambda} + \epsilon_1 \right)^2. \end{aligned}$$

then we set:

$$\frac{12L\tau(1+c)^2}{n\mu_c} \left[ \left( \frac{2}{\rho\lambda} + 1 \right) \epsilon_1 \right]^2 \leq \left( 16 + \frac{6L}{n\mu_c} \right) \epsilon_1, \quad (27)$$

equivalently:

$$\left( \frac{2}{\rho\lambda} + 1 \right)^2 \epsilon_1 \leq \frac{8n\mu_c + 3L}{6L\tau(1+c)^2}, \quad (28)$$

and denote  $\mathcal{D}(x^0, x^*) := 16[F(x^0) - F^*] + \frac{6L}{n}\|x^0 - x^*\|_2^2$ , we have:

$$\epsilon_1 := \frac{\mathcal{D}(x^0, x^*)}{(S_0 + 3)^2} \leq \frac{8n\mu_c + 3L}{6L\tau(1+c)^2(\frac{2}{\rho\lambda} + 1)^2}. \quad (29)$$

Hence in order to satisfy inequality (27), it is enough to set:

$$S_0 \geq \left\lceil \left(1 + \frac{2}{\rho\lambda}\right) \sqrt{2\tau(1+c)^2\mathcal{D}(x^0, x^*)} \right\rceil \geq \left\lceil \left(1 + \frac{2}{\rho\lambda}\right) \sqrt{\frac{6L\tau(1+c)^2\mathcal{D}(x^0, x^*)}{8n\mu_c + 3L}} \right\rceil. \quad (30)$$

By this choice of  $S_0$ , according to inequality (27) we can write:

$$\mathbb{E}_{\xi_1}[F(x^2) - F^*] \leq \frac{32 + \frac{12L}{n\mu_c}}{(S + 3)^2} \epsilon_1, \quad (31)$$

to get  $\mathbb{E}_{\xi_1}[F(x^2) - F^*] \leq \frac{\alpha}{\beta^2} \epsilon_1 = \epsilon_2$ , it is enough to set:

$$S = \left\lceil \beta \sqrt{32 + \frac{12L}{n\mu_0}} \right\rceil. \quad (32)$$

**Induction step 2:** For the  $(t + 1)$ -th iteration, according to the induction hypothesis, we have  $\mathbb{E}_{\xi_{t-1}}F(x^t) - F^* \leq \frac{\alpha\epsilon_{t-1}}{\beta^2} = \epsilon_t$ , and hence with probability  $1 - \frac{\rho_t}{2}$  we have:

$$\begin{aligned} \mathbb{E}_{\xi_t}[F(x^{t+1}) - F^*] &\leq \frac{16 + \frac{6L}{n\mu_c}}{(S + 3)^2} \mathbb{E}_{\xi_{t-1}}[F(x^t) - F^*] + \frac{12L\tau(1+c)^2}{n\mu_c(S + 3)^2} v_t^2 \\ &= \frac{16 + \frac{6L}{n\mu_c}}{(S + 3)^2} \epsilon_t + \frac{12L\tau(1+c)^2}{n\mu_c(S + 3)^2} \left( \frac{2\epsilon_t}{\rho_t\lambda} + \varepsilon \right)^2 \\ &\leq \frac{16 + \frac{6L}{n\mu_c}}{(S + 3)^2} \epsilon_t + \frac{12L\tau(1+c)^2}{n\mu_c(S + 3)^2} \left( \frac{2\epsilon_t}{\rho_t\lambda} + \epsilon_t \right)^2. \end{aligned}$$

then we set:

$$\frac{12L\tau(1+c)^2}{n\mu_c} \left[ \left( \frac{2}{\rho_t\lambda} + 1 \right) \epsilon_t \right]^2 \leq \left( 16 + \frac{6L}{n\mu_c} \right) \epsilon_t, \quad (33)$$

equivalently:

$$\left( \frac{2}{\rho_t\lambda} + 1 \right)^2 \epsilon_t \leq \frac{8n\mu_c + 3L}{6L\tau(1+c)^2}, \quad (34)$$

Now because  $\rho_t = \frac{\sqrt{\alpha}}{\beta} \rho_{t-1}$ ,  $\epsilon_t = \frac{\alpha}{\beta^2} \epsilon_{t-1}$ , we have:

$$\left( \frac{2}{\rho_t\lambda} + 1 \right)^2 \epsilon_t = \left( \frac{2}{\rho_{t-1}\lambda} + \frac{\sqrt{\alpha}}{\beta} \right)^2 \epsilon_{t-1} \leq \left( \frac{2}{\rho_{t-1}\lambda} + 1 \right)^2 \epsilon_{t-1} \leq \dots \leq \left( \frac{2}{\rho_1\lambda} + 1 \right)^2 \epsilon_1. \quad (35)$$

Hence by the same choice of  $S_0$  given by (30), inequality (33) holds and consequently we can have:

$$\mathbb{E}_{\xi_t}[F(x^{t+1}) - F^*] \leq \frac{32 + \frac{12L}{n\mu_c}}{(S + 3)^2} \epsilon_t, \quad (36)$$

to get  $\mathbb{E}_{\xi_t}[F(x^{t+1}) - F^*] \leq \frac{\alpha}{\beta^2} \epsilon_t = \epsilon_{t+1}$ , it is enough to set:

$$S = \left\lceil \beta \sqrt{32 + \frac{12L}{n\mu_c}} \right\rceil. \quad (37)$$

Hence we finish the induction – by the choice of:

$$S_0 \geq \left\lceil \left(1 + \frac{2}{\rho\lambda}\right) \sqrt{2\tau(1+c)^2\mathcal{D}(x^0, x^*)} \right\rceil, \quad S = \left\lceil \beta \sqrt{32 + \frac{12L}{n\mu_0}} \right\rceil, \quad (38)$$

then we will have:

$$\mathbb{E}_{\xi_t}[F(x^{t+1}) - F^*] \leq \frac{\alpha \epsilon_t}{\beta^2} \quad (39)$$

where  $\epsilon_{t+1} = \frac{\alpha}{\beta^2} \epsilon_t$  and  $\epsilon_1 = \frac{\mathcal{D}(x^0, x^*)}{(S_0+3)^2} = \frac{4}{n(S_0+3)^2} \left[ 4n(F(x^0) - F^*) + \frac{3L}{2} \|x^0 - x^*\|_2^2 \right]$ , with probability  $1 - \frac{1}{2} \sum_{i=1}^t \rho_i \geq 1 - \frac{\rho}{2} \frac{\beta}{\beta - \sqrt{\alpha}} \geq 1 - \rho$ . Now we have finished the proof of Theorem B.1.

**Proof of Corollary B.2.** Finally we make a summary of this result for the proof of Corollary B.2. First we write the number of snapshot point calculation we need to achieve  $\mathbb{E}_{\xi_{t-1}} F(x^t) - F^* \leq \delta$  at the second stage:

$$N_s = \left\lceil \beta \sqrt{32 + \frac{12L}{n\mu_0}} \right\rceil \log_{\frac{\beta^2}{\alpha}} \frac{F(x^1) - F^*}{\delta}. \quad (40)$$

When  $\frac{2n\mu_c}{L} \leq \frac{3}{4}$ ,  $N_s = O\left(\sqrt{\frac{L}{2n\mu_c}} \log \frac{F(x^1) - F^*}{\delta}\right)$ ; when  $\frac{2n\mu_c}{L} \geq \frac{3}{4}$ ,  $N_s = O\left(\log \frac{F(x^1) - F^*}{\delta}\right)$ .

Hence it is enough to run  $O\left((1 + \sqrt{\frac{L}{2n\mu_c}}) \log \frac{F(x^1) - F^*}{\delta}\right) \geq O\left(\max(1, \sqrt{\frac{L}{2n\mu_c}}) \log \frac{F(x^1) - F^*}{\delta}\right)$

epochs. Since we set the epoch length  $m = 2n$  and hence the number of stochastic gradient  $\nabla f_i(\cdot)$  calculation is of  $O(n)$ . Therefore with some more trivial calculation we conclude that the complexity of the Rest-Katyusha algorithm is:

$$N \geq O\left(n + \sqrt{\frac{nL}{\mu_0}}\right) \log_{\frac{\beta^2 \mu_c}{\mu_0}} \frac{\frac{1}{\rho(S_0+3)^2} \left[ 16(F(x^0) - F^*) + \frac{6L}{n} \|x^0 - x^*\|_2^2 \right]}{\delta} + O(n)S_0. \quad (41)$$

□

## C Numerical test for different choices of $\beta$

In this section we provide additional experimental result on different choices of  $\beta$ . We choose to use the REGED dataset in this experiment as a example.

Figure 1: Comparison of different choices of  $\beta$

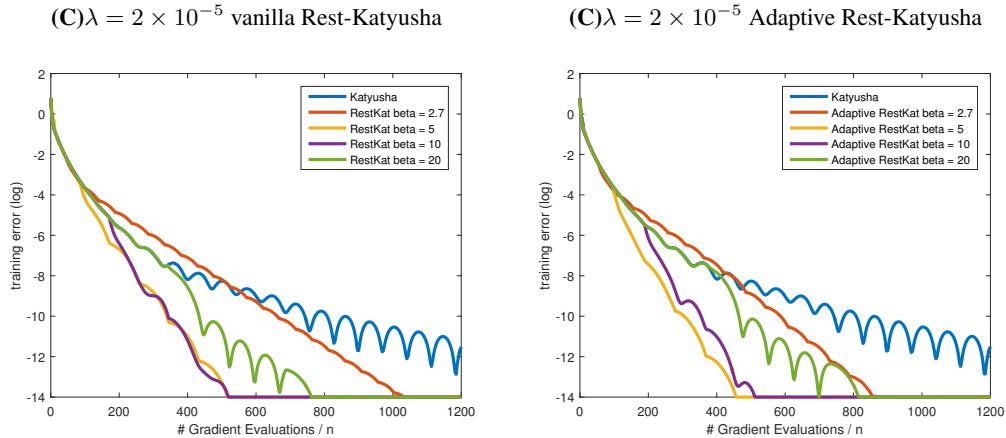

We test the Rest-Katyusha and Adaptive Rest-Katyusha on regularization level  $\lambda = 2 \times 10^{-5}$  with 4 different choices of  $\beta$  including the theoretically optimal choice which is approximately 2.7. However we found out that the choice of  $\beta$  which provides the best practical performance is often slightly

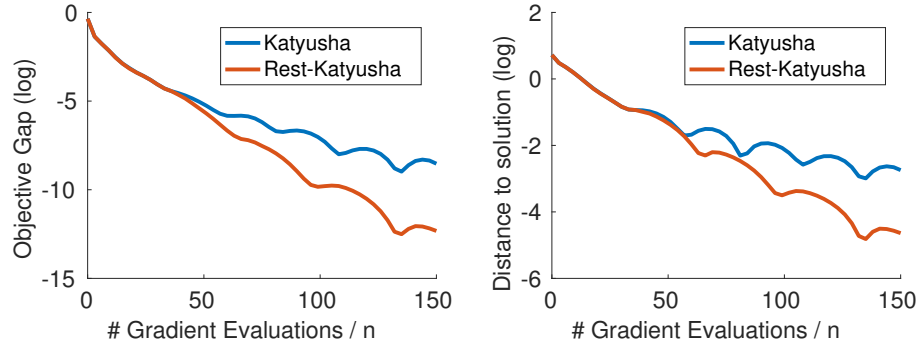

Figure 2: Lasso regression on News20 dataset

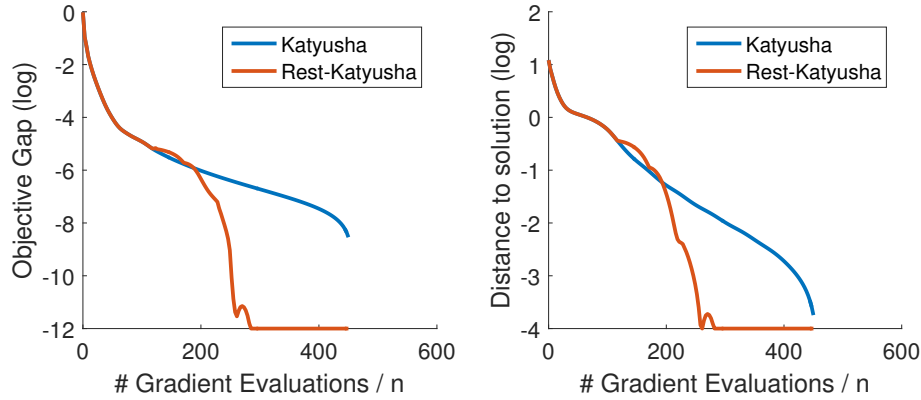

Figure 3: Lasso regression on Sector dataset

larger in experiments for real datasets. For this specific example, we can see that the best choice for  $\beta$  is 5 or 10 for both Rest-Katyusha and Adaptive Rest-Katyusha.

## D Some more additional results

We provide here an additional large-scale sparse regression result on the benchmark *News20* dataset (class 1, the version by J. Rennie. “*Improving Multi-class Text Classification with Naive Bayes*”. 2001) which sized 15935 by 62061, as well as the *Sector* dataset which sized 6412 by 55197, both of these datasets are available online on LIBSVM website. We also plot the  $\ell_2$  distance towards a solution  $x^*$  where after a large number of iterations both of the algorithms will actually converge to. We can clearly see that for this specific case, minimizing the objective in a low precision is not enough to ensure that we are close to the solution, i.e. a  $10^{-5}$  objective gap accuracy means only  $10^{-1}$  accuracy on the optimization variable (geometrically the objective can be very flat along some directions).

## References

- [1] Z. Allen-Zhu. Katyusha: The first direct acceleration of stochastic gradient methods. *arXiv preprint arXiv:1603.05953*, 2016.
